# Supplementary material
Source: publisher site journal article supplement (https://www.dovepress.com/article/491733)
Supplement: Supplementary file 1 [file get_supplementary_file.php]

Supplementary Table 1. Prognostic factors for progression-free survival.

| **Characteristic** | **Univariable** | | | | | **Multivariable** | | | | |
| --- | --- | --- | --- | --- | --- | --- | --- | --- | --- | --- |
| **N** | **Event N** | **HR** | **95% CI** | **P value** | **N** | **Event N** | **HR** | **95% CI** | **P value** |
| **Age** |  |  |  |  |  |  |  |  |  |  |
| ˂ 60 | 100 | 83 | — | — |  | 100 | 83 | — | — |  |
| ˃ 60 | 44 | 34 | 0.75 | 0.50, 1.12 | 0.165 | 44 | 34 | 0.63 | 0.42, 0.95 | 0.029 |
| **Sex** |  |  |  |  |  |  |  |  |  |  |
| Female | 25 | 23 | — | — |  | 25 | 23 | — | — |  |
| Male | 119 | 94 | 0.72 | 0.46, 1.14 | 0.162 | 119 | 94 | 0.52 | 0.31, 0.85 | 0.009 |
| **Albumin** |  |  |  |  |  |  |  |  |  |  |
| ˂ 35 | 28 | 22 | — | — |  |  |  |  |  |  |
| ˃ 35 | 116 | 95 | 1.06 | 0.66, 1.68 | 0.819 |  |  |  |  |  |
| **HBsAg** |  |  |  |  |  |  |  |  |  |  |
| Negative | 43 | 35 | — | — |  |  |  |  |  |  |
| Positive | 101 | 82 | 0.98 | 0.66, 1.46 | 0.930 |  |  |  |  |  |
| **AFP ng/ml** |  |  |  |  |  |  |  |  |  |  |
| ˂ 400 | 62 | 50 | — | — |  |  |  |  |  |  |
| ˃ 400 | 82 | 67 | 1.14 | 0.79, 1.65 | 0.476 |  |  |  |  |  |
| **Alanine aminotransferase** |  |  |  |  |  |  |  |  |  |  |
| ˂ 44 | 111 | 91 | — | — |  |  |  |  |  |  |
| ˃ 44 | 33 | 26 | 0.88 | 0.57, 1.36 | 0.557 |  |  |  |  |  |
| **Total bilirubin** |  |  |  |  |  |  |  |  |  |  |
| ˂ 17.1 | 78 | 65 | — | — |  |  |  |  |  |  |
| ˃ 17.1 | 66 | 52 | 0.78 | 0.54, 1.12 | 0.175 |  |  |  |  |  |
| **Platelet** |  |  |  |  |  |  |  |  |  |  |
| ˂ 100 | 17 | 14 | — | — |  |  |  |  |  |  |
| ˃ 100 | 127 | 103 | 0.79 | 0.45, 1.39 | 0.412 |  |  |  |  |  |
| **Tumor number** |  |  |  |  |  |  |  |  |  |  |
| Multiple | 70 | 62 | — | — |  | 70 | 62 | — | — |  |
| Single | 74 | 55 | 0.66 | 0.46, 0.96 | 0.028 | 74 | 55 | 0.62 | 0.43, 0.90 | 0.011 |
| **Maximum tumor diameter** |  |  |  |  |  |  |  |  |  |  |
| ˂ 5 | 67 | 55 | — | — |  |  |  |  |  |  |
| ˃ 5 | 77 | 62 | 1.01 | 0.70, 1.45 | 0.968 |  |  |  |  |  |
| **Number of lung metastatic lesions** |  |  |  |  |  |  |  |  |  |  |
| 1 | 44 | 33 | — | — |  | 44 | 33 | — | — |  |
| ˃3 | 80 | 70 | 1.45 | 0.96, 2.20 | 0.078 | 80 | 70 | 1.82 | 1.19, 2.79 | 0.006 |
| 2 | 14 | 9 | 0.92 | 0.44, 1.92 | 0.824 | 14 | 9 | 1.26 | 0.59, 2.69 | 0.542 |
| 3 | 6 | 5 | 1.20 | 0.47, 3.08 | 0.707 | 6 | 5 | 1.41 | 0.54, 3.69 | 0.485 |
| **PVTT** |  |  |  |  |  |  |  |  |  |  |
| With | 59 | 50 | — | — |  |  |  |  |  |  |
| Without | 85 | 67 | 0.74 | 0.51, 1.07 | 0.111 |  |  |  |  |  |
| **Child-Pugh classification** |  |  |  |  |  |  |  |  |  |  |
| A5 | 79 | 63 | — | — |  |  |  |  |  |  |
| A6 | 53 | 46 | 1.26 | 0.86, 1.85 | 0.235 |  |  |  |  |  |
| B7 | 12 | 8 | 0.76 | 0.36, 1.58 | 0.458 |  |  |  |  |  |
| **ECOG performance status score** |  |  |  |  |  |  |  |  |  |  |
| 0 | 107 | 88 | — | — |  |  |  |  |  |  |
| 1 | 37 | 29 | 0.87 | 0.57, 1.32 | 0.509 |  |  |  |  |  |
| **Other extrahepatic spread** |  |  |  |  |  |  |  |  |  |  |
| None | 103 | 84 | — | — |  |  |  |  |  |  |
| Bone | 15 | 14 | 1.40 | 0.79, 2.47 | 0.247 |  |  |  |  |  |
| Lymph node | 26 | 19 | 0.68 | 0.41, 1.13 | 0.141 |  |  |  |  |  |
| **group** |  |  |  |  |  |  |  |  |  |  |
| S+L | 105 | 87 | — | — |  | 105 | 87 | — | — |  |
| RT+S+L | 39 | 30 | 0.61 | 0.40, 0.94 | 0.025 | 39 | 30 | 0.49 | 0.31, 0.78 | 0.002 |

HR, hazard ratio; CI, confidence interval; HBsAg, hepatitis B surface antigen; AFP, alpha fetoprotein; ECOG, Eastern Cooperative Oncology Group; PVTT, portal vein tumor thrombus; RT+S+L, radiotherapy combine with sintilimab plus lenvatinib; S+L, sintilimab plus lenvatinib.

Supplementary Table 2. Prognostic factors for overall survival.

| **Characteristic** | **Univariable** | | | | | **Multivariable** | | | | |
| --- | --- | --- | --- | --- | --- | --- | --- | --- | --- | --- |
| **N** | **Event N** | **HR** | **95% CI** | **P value** | **N** | **Event N** | **HR** | **95% CI** | **P value** |
| **Age** |  |  |  |  |  |  |  |  |  |  |
| ˂ 60 | 100 | 67 | — | — |  | 100 | 67 | — | — |  |
| ˃ 60 | 44 | 29 | 0.94 | 0.61, 1.46 | 0.784 | 44 | 29 | 0.80 | 0.51, 1.26 | 0.338 |
| **Sex** |  |  |  |  |  |  |  |  |  |  |
| Female | 25 | 20 | — | — |  | 25 | 20 | — | — |  |
| Male | 119 | 76 | 0.81 | 0.49, 1.32 | 0.395 | 119 | 76 | 0.69 | 0.41, 1.16 | 0.164 |
| **Albumin** |  |  |  |  |  |  |  |  |  |  |
| ˂ 35 | 28 | 20 | — | — |  |  |  |  |  |  |
| ˃ 35 | 116 | 76 | 0.76 | 0.47, 1.25 | 0.285 |  |  |  |  |  |
| **HBsAg** |  |  |  |  |  |  |  |  |  |  |
| Negative | 43 | 30 | — | — |  |  |  |  |  |  |
| Positive | 101 | 66 | 0.89 | 0.58, 1.37 | 0.593 |  |  |  |  |  |
| **AFP ng/ml** |  |  |  |  |  |  |  |  |  |  |
| ˂ 400 | 62 | 39 | — | — |  |  |  |  |  |  |
| ˃ 400 | 82 | 57 | 1.40 | 0.93, 2.10 | 0.109 |  |  |  |  |  |
| **Alanine aminotransferase** |  |  |  |  |  |  |  |  |  |  |
| ˂ 44 | 111 | 75 | — | — |  |  |  |  |  |  |
| ˃ 44 | 33 | 21 | 0.90 | 0.56, 1.47 | 0.678 |  |  |  |  |  |
| **Total bilirubin** |  |  |  |  |  |  |  |  |  |  |
| ˂ 17.1 | 78 | 55 | — | — |  |  |  |  |  |  |
| ˃ 17.1 | 66 | 41 | 0.86 | 0.57, 1.28 | 0.455 |  |  |  |  |  |
| **Platelet** |  |  |  |  |  |  |  |  |  |  |
| ˂ 100 | 17 | 12 | — | — |  |  |  |  |  |  |
| ˃ 100 | 127 | 84 | 0.67 | 0.37, 1.24 | 0.203 |  |  |  |  |  |
| **Tumor number** |  |  |  |  |  |  |  |  |  |  |
| Multiple | 70 | 55 | — | — |  | 70 | 55 | — | — |  |
| Single | 74 | 41 | 0.57 | 0.38, 0.85 | 0.006 | 74 | 41 | 0.64 | 0.42, 0.96 | 0.031 |
| **Maximum tumor diameter** |  |  |  |  |  |  |  |  |  |  |
| ˂ 5 | 67 | 43 | — | — |  |  |  |  |  |  |
| ˃ 5 | 77 | 53 | 1.11 | 0.74, 1.66 | 0.612 |  |  |  |  |  |
| **Number of lung metastatic lesions** |  |  |  |  |  |  |  |  |  |  |
| 1 | 44 | 29 | — | — |  |  |  |  |  |  |
| ˃3 | 80 | 57 | 1.11 | 0.71, 1.73 | 0.654 |  |  |  |  |  |
| 2 | 14 | 8 | 1.10 | 0.50, 2.42 | 0.807 |  |  |  |  |  |
| 3 | 6 | 2 | 0.39 | 0.09, 1.65 | 0.202 |  |  |  |  |  |
| **PVTT** |  |  |  |  |  |  |  |  |  |  |
| With | 59 | 48 | — | — |  | 59 | 48 | — | — |  |
| Without | 85 | 48 | 0.49 | 0.32, 0.73 | <0.001 | 85 | 48 | 0.49 | 0.33, 0.75 | <0.001 |
| **Child-Pugh classification** |  |  |  |  |  |  |  |  |  |  |
| A5 | 79 | 49 | — | — |  |  |  |  |  |  |
| A6 | 53 | 40 | 1.36 | 0.89, 2.06 | 0.154 |  |  |  |  |  |
| B7 | 12 | 7 | 0.82 | 0.37, 1.81 | 0.618 |  |  |  |  |  |
| **ECOG performance status score** |  |  |  |  |  |  |  |  |  |  |
| 0 | 107 | 73 | — | — |  |  |  |  |  |  |
| 1 | 37 | 23 | 0.76 | 0.47, 1.21 | 0.247 |  |  |  |  |  |
| **Other extrahepatic spread** |  |  |  |  |  |  |  |  |  |  |
| None | 103 | 71 | — | — |  |  |  |  |  |  |
| Bone | 15 | 10 | 1.12 | 0.58, 2.18 | 0.734 |  |  |  |  |  |
| Lymph node | 26 | 15 | 0.64 | 0.36, 1.12 | 0.116 |  |  |  |  |  |
| **group** |  |  |  |  |  |  |  |  |  |  |
| S+L | 105 | 75 | — | — |  | 105 | 75 | — | — |  |
| RT+S+L | 39 | 21 | 0.58 | 0.35, 0.94 | 0.027 | 39 | 21 | 0.53 | 0.32, 0.87 | 0.013 |

HR, hazard ratio; CI, confidence interval; HBsAg, hepatitis B surface antigen; AFP, alpha fetoprotein; ECOG, Eastern Cooperative Oncology Group; PVTT, portal vein tumor thrombus; RT+S+L, radiotherapy combine with sintilimab plus lenvatinib; S+L, sintilimab plus lenvatinib.

Supplementary Table 3. First site of progression

|  | RT+S+L group (n=39) | S+L group (n=105) |
| --- | --- | --- |
| Number of patients with disease progression | 30 | 87 |
| Intrahepatic progression | 24 (80.0%) | 66 (75.9%) |
| Extrahepatic progression | 2 (6.7%) | 8 (9.2%) |
| Intrahepatic progression and Extrahepatic progression | 4 (13.3%) | 13 (14.9%) |

Supplementary Table 4. Treatment on progression

|  | RT+S+L group (n=30) | S+L group (n=87) |
| --- | --- | --- |
| Regorafenib | 10 (33.3%) | 31 (35.6%) |
| Apatinib | 7 (23.3%) | 16 (18.4%) |
| Atezolizumab plus bevacizumab | 6 (20.0%) | 23 (26.4%) |
| Donafenib | 5 (16.7%) | 12 (13.8%) |
| Supportive care/refused treatment | 2 (6.7%) | 5 (5.7%) |
